# Supplementary material
Source: publisher figshare collection journal article supplement (https://acs.figshare.com/ndownloader/files/4545937)
Supplement: Supplementary file 1 [file 4545937]

# Europium(III) complex probing distribution of functions grafted using molecular stencil patterning in 2D Hexagonal mesostructured porous silica

S. Abry, F. Lux, B. Albela, A. Artigas-Miquel, S. Nicolas, B. Jarry, G. Lemerrier, L. Bonneviot

*Laboratoire de Chimie, UMR n°5182, CNRS/ENS-Lyon, 46 Allée d'Italie, 69364 Lyon Cedex 07, France.*

*E-mail :Laurent.bonneviot@ens-lyon.fr.*

G. Lemerrier

*Université de Reims Champagne-Ardenne, CNRS, ICMR, Moulin de la Housse - BP 1039 - 51687 Reims Cedex 2, France.*

P. Perriat

*Université de Lyon, MATEIS, INSA- Lyon, CNRS  
69621 Villeurbanne Cedex, France.*

**Table S1.** Quantification of chemical species from elemental analysis reported in mmol.g<sup>-1</sup>.

| Materials      | TMS <sup>[a]</sup><br>± 10% | APS<br>± 5%         | Phen<br>±10%        | Eu<br>±5%           |
|----------------|-----------------------------|---------------------|---------------------|---------------------|
| LUS-PS         | 2.15                        |                     |                     |                     |
| LUS-PS-AP      | 1.83                        | 1.50 <sup>[b]</sup> |                     |                     |
| LUS-PS-Phen    | 1.59                        | 0.46 <sup>[c]</sup> | 0.46 <sup>[c]</sup> |                     |
| LUS-PS-Phen-Eu | 1.38                        | 0.00 <sup>[c]</sup> | 0.43 <sup>[c]</sup> | 0.12 <sup>[d]</sup> |

[a] determined by integration of the IR peak at 850 cm<sup>-1</sup> and normalized to the intensity peak at 450 cm<sup>-1</sup>; [b] determined elemental analysis of N; [c] from elemental analysis by C/N ratio considering C/N = 6.66 for the entire 1,10-phenanthroline-imino moiety and C/N = 3 for aminopropyl groups; [d] corresponds to Eu/Si<sub>inorg</sub> = 0.009 in mole ratio.

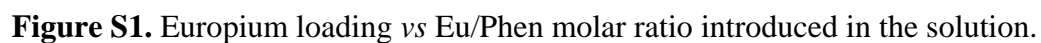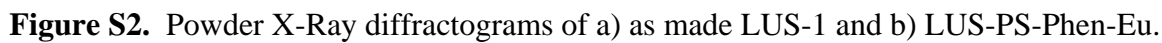

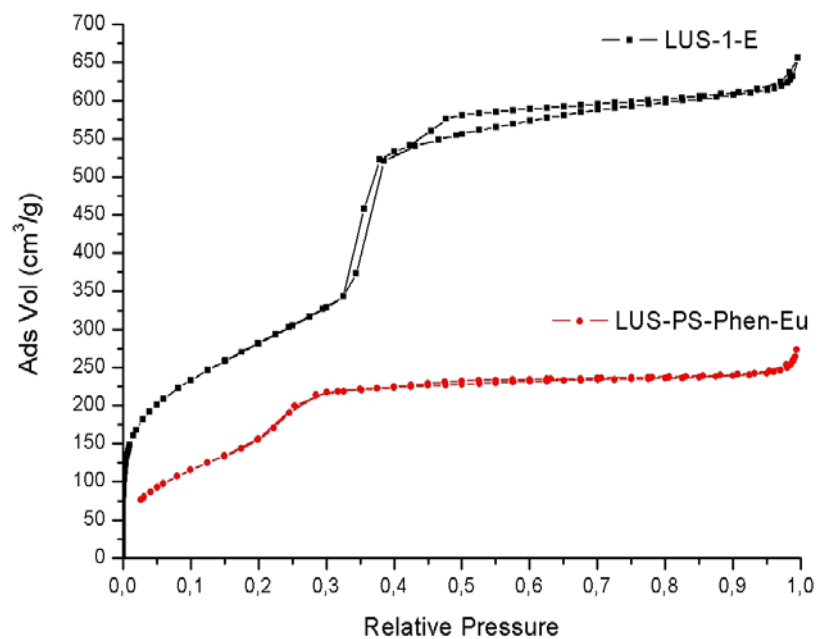

**Figure S3.** Nitrogen adsorption-desorption isotherms of (a) LUS-1 extracted in  $6 \cdot 10^{-2} \text{ mol.L}^{-1}$  ammonium acetate ethanolic solution and (b) LUS-PS-Phen-Eu at 77 K.

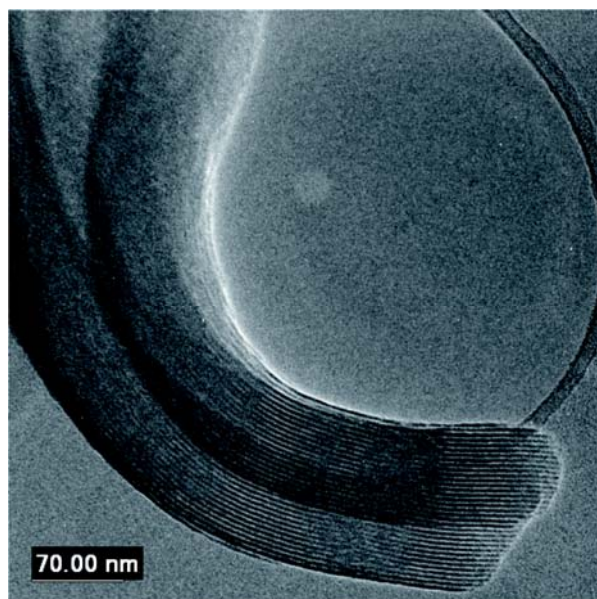

**Figure S4.** TEM picture of LUS-PS-Phen-Eu of two isolated fibers (zoom of the first picture in the bottom of Figure 3).

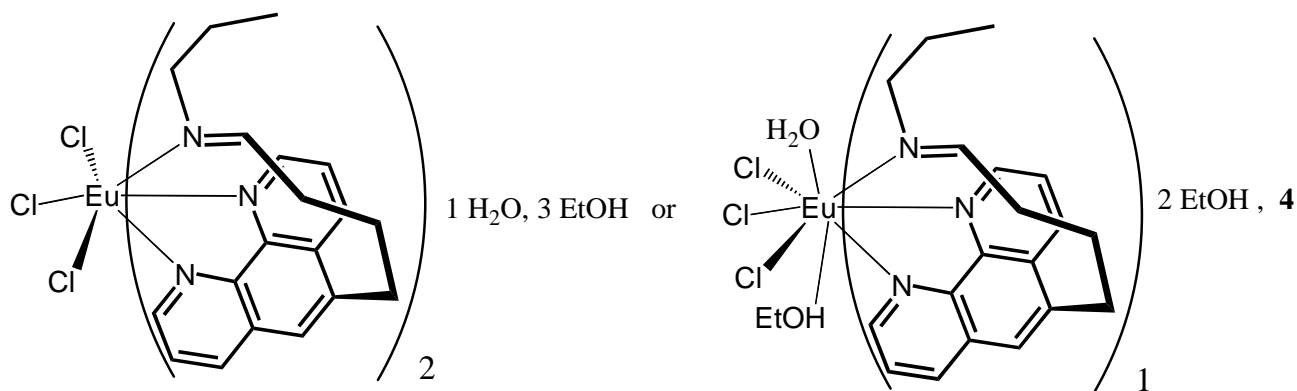

**Figure S5.** Tentative structures for the molecular complex **5** matching the empirical formula  $\text{EuC}_{44}\text{H}_{62}\text{N}_6\text{Cl}_3\text{O}_4$  as the preferred, for  $\text{EuC}_{38}\text{H}_{42}\text{N}_6\text{Cl}_3 \cdot 1\text{H}_2\text{O} \cdot 3\text{EtOH}$  and assuming a mononuclear species (left hand side) with two “phen-imine-type” **4** inner sphere ligands and (right hand side) with one “phen-imine-type” inner sphere ligand and one outer sphere “phen-imine-type” molecule as in some of such type of complexes (see text).

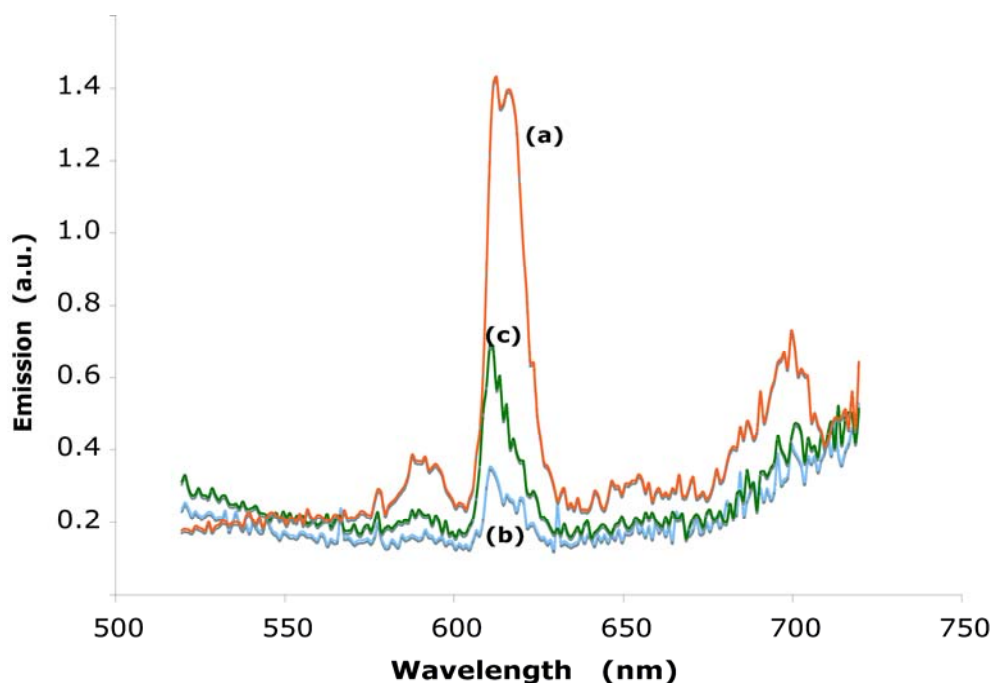

**Figure S6.** Emission spectra of compounds LUS-PS-Phen-Eu (a), LUS-PS-AP-Eu(Phen)<sub>2</sub> (b) and LUS-PS-AP-EuCl<sub>3</sub> (c).

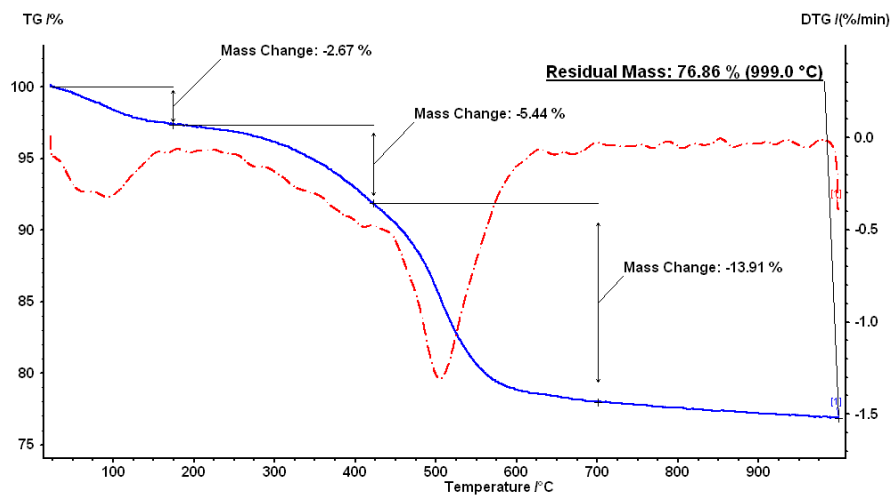

a)

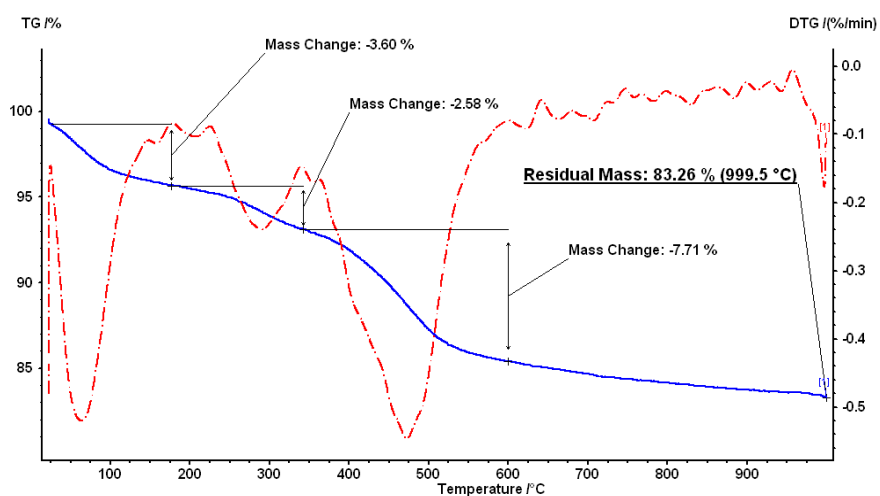

b)

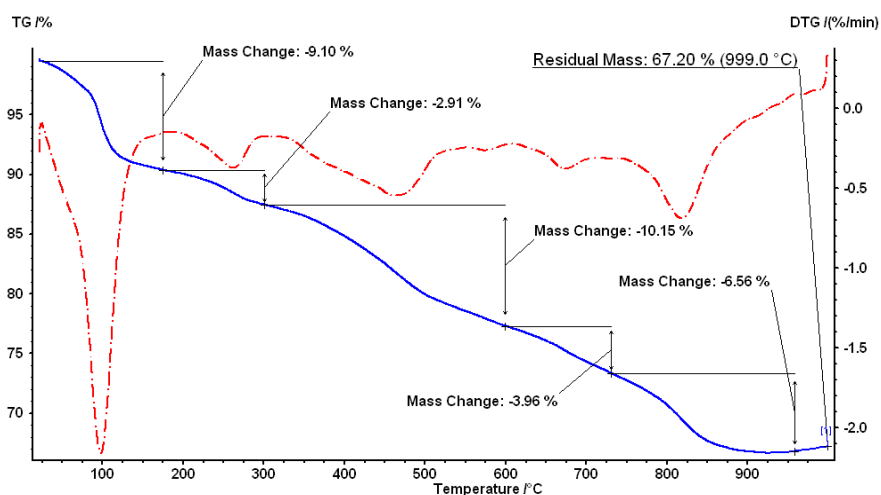

c)

**Figure S7.** Thermal Gravimetric Analysis (TGA) of compounds LUS-PS-Phen-Eu (a), LUS-PS-AP-Eu(phen)<sub>2</sub> (b) and LUS-PS-AP-EuCl<sub>3</sub> (c).
